# Supplementary material
Source: Springer Nature journal article supplement (https://www.springermedizin.de/resource/supplementary/12889_2009_3035_MOESM6_ESM.pdf/9487894)

Time 1

Time 2

Time 3

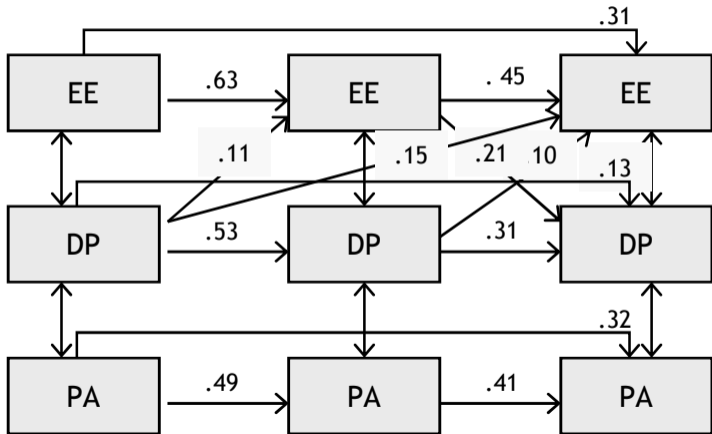

Supplement: MOESM6 [file 9487894]
